# Supplementary material for: Molecular Characterization of Hepatitis B Virus Infection in a Patient with Cutaneous Lupus Erythematosus
Source: MDPI journal article supplement (doi:10.3390/diagnostics12112866), 2022-11-19
Supplement: s1 [file s1]

Table S1. The Accession numbers of the HBV sequences used in molecular investigations for the third, fourth, fifth and sixth dataset.

| Accession numbers    | Tip names |
|----------------------|-----------|
| <b>third dataset</b> |           |
| EU908801.1           | 1IT       |
| MH724235.1           | 2BR       |
| KY809965.1           | 3BR       |
| JN688708.2           | 4AR       |
| MN310710.1           | 6BR       |
| MN310709.1           | 7BR       |
| MN702735.1           | 8IT       |
| MN702714.1           | 9IT       |
| MH724214.1           | 10BR      |
| KY810010.1           | 11BR      |
| KY809974.1           | 12BR      |
| KY809961.1           | 13BR      |
| KP090181.1           | 14BR      |
| KP091719.1           | 15IT      |
| JF815660.1           | 16BR      |
| JF815651.1           | 17BR      |
| JF815645.1           | 18BR      |
| JF815634.1           | 19BR      |
| JF815633.1           | 20BR      |
| JF815622.1           | 21BR      |
| JF815610.1           | 22BR      |
| JF815609.1           | 23BR      |
| EU908826.1           | 25IT      |
| KY809976.1           | 26BR      |
| MN310715.1           | 27BR      |
| MN310708.1           | 28BR      |
| MN702750.1           | 29IT      |
| MN702732.1           | 30IT      |
| MN702726.1           | 31IT      |
| MN702711.1           | 32IT      |
| MH724243.1           | 33BR      |
| MH724233.1           | 34BR      |
| MH464853.1           | 35BO      |
| MH464852.1           | 36BO      |
| MH464850.1           | 37BO      |
| MH464847.1           | 38BO      |
| MH464846.1           | 39BO      |
| MH464845.1           | 40BO      |
| MH464839.1           | 41BO      |
| MH464837.1           | 42BO      |
| MH464832.1           | 43BO      |

|            |      |
|------------|------|
| MH464831.1 | 44BO |
| KY810011.1 | 45BR |
| KY809979.1 | 46BR |
| KT347090.1 | 47ZA |
| KR139747.1 | 48BO |
| KP091720.1 | 49IT |
| JN688689.2 | 50AR |
| HE974377.1 | 52MT |
| JF815656.1 | 53BR |
| JF815655.1 | 54BR |
| JF815637.1 | 55BR |
| JF815635.1 | 56BR |
| JF815632.1 | 57BR |
| JF815627.1 | 58BR |
| JF815626.1 | 59BR |
| JF815625.1 | 60BR |
| JF815624.1 | 61BR |
| JF815616.1 | 62BR |
| JF815615.1 | 63BR |
| JF815608.1 | 64BR |
| EU908830.1 | 68IT |
| EU908809.1 | 69IT |
| X65257.1   | 70IT |
| GQ922002.1 | 71CA |
| GQ922001.1 | 72CA |
| MH724234.1 | 73BR |
| MN310713.1 | 74BR |
| MN702749.1 | 75IT |
| MN702744.1 | 76IT |
| MN702729.1 | 77IT |
| MN702724.1 | 78IT |
| MN702723.1 | 79IT |
| MH724248.1 | 80BR |
| MH724230.1 | 81BR |
| MH724229.1 | 82BR |
| MH724228.1 | 83BR |
| MH724227.1 | 84BR |
| MH724225.1 | 85BR |
| MH724224.1 | 86BR |
| MH464854.1 | 87BO |
| MH464848.1 | 88BO |
| MH464843.1 | 89BO |
| MH464836.1 | 90BO |
| MH464834.1 | 91BO |
| MF979162.1 | 92BO |
| KY810013.1 | 93BR |

|                       |        |
|-----------------------|--------|
| KY809981.1            | 94BR   |
| KY809959.1            | 95BR   |
| KY809957.1            | 96BR   |
| KX372199.1            | 97BE   |
| MH464841.1            | 98BO   |
| MH464838.1            | 99BO   |
| <b>fourth dataset</b> |        |
| AY233291              | 1ZA    |
| EU594434              | 2Eston |
| X65257                | 3IT    |
| MH724235.1            | 4BR    |
| KY809965.1            | 5BR    |
| JN688708              | 6AR    |
| EU908801              | 7IT    |
| KY210496.1            | 8UZ    |
| KY210495              | 9UZ    |
| MN310710              | 10BR   |
| MN310709              | 11BR   |
| MT004769              | 12EG   |
| MN702750.1            | 13IT   |
| MN702735.1            | 14IT   |
| MN702732.1            | 15IT   |
| MN702714              | 16IT   |
| MH724234              | 17BR   |
| MH724214              | 18BR   |
| KY810010              | 19BR   |
| KY809979.1            | 20BR   |
| KY809974.1            | 21BR   |
| KY809961.1            | 22BR   |
| KP090181.1            | 23BR   |
| KP091719.1            | 24IT   |
| JF815660.1            | 25BR   |
| JF815655.1            | 26BR   |
| JF815651.1            | 27BR   |
| JF815645.1            | 28BR   |
| JF815634.1            | 29BR   |
| JF815633.1            | 30BR   |
| JF815632.1            | 31BR   |
| JF815626.1            | 32BR   |
| JF815624.1            | 33BR   |
| JF815622.1            | 34BR   |
| JF815619.1            | 35BR   |
| JF815616.1            | 36BR   |
| JF815612.1            | 37BR   |
| JF815611.1            | 38BR   |
| JF815610.1            | 39BR   |

|              |        |
|--------------|--------|
| JF815609.1   | 40BR   |
| EU908826.1   | 41IT   |
| KY809976.1   | 42BR   |
| MN310715.1   | 43BR   |
| JN688689.2   | 44AR   |
| MN310708.1   | 45BR   |
| MT004773.1   | 46EG   |
| MT004770.1   | 47EG   |
| MN702724.1   | 48IT   |
| MN702711.1   | 49IT   |
| MH724243.1   | 50BR   |
| MH724233.1   | 51BR   |
| MH464853.1   | 52BO   |
| MH464852.1   | 53BO   |
| MH464850.1   | 54BO   |
| MH464847.1   | 55BO   |
| MH464846.1   | 56BO   |
| MH464845.1   | 57BO   |
| MH464839.1 H | 58BO   |
| MH464837.1   | 59BO   |
| MH464832.1   | 60BO   |
| MH464831.1   | 61BO   |
| KY210523.1   | 62KYRG |
| KY810011.1   | 63BR   |
| KY810003.1   | 64BR   |
| KY809985.1   | 65BR   |
| KY809959.1   | 66BR   |
| KY809957.1   | 67BR   |
| KT347090.1   | 68ZA   |
| KR139747.1   | 69BO   |
| KP091720.1   | 70IT   |
| KM519455.1   | 71ZA   |
| KC752145.1   | 72IN   |
| HE974377.1   | 73MART |
| JX090694.1   | 74RU   |
| JF815676.1   | 75BR   |
| JF815656.1   | 76BR   |
| JF815637.1   | 77BR   |
| JF815635.1   | 78BR   |
| JF815628.1   | 79BR   |
| JF815627.1   | 80BR   |
| JF815625.1   | 81BR   |
| JF815615.1   | 82BR   |
| JF815608.1   | 83BR   |
| HM101109.1   | 84BR   |
| GQ922002.1   | 85CA   |

|                                |      |
|--------------------------------|------|
| GQ922001.1                     | 86CA |
| EU908830.1                     | 87IT |
| EU908823.1                     | 88IT |
| EU908811.1                     | 89IT |
| EU908809.1                     | 90IT |
| MN310713.1                     | 91BR |
| MN702749.1                     | 92IT |
| MN702744.1                     | 93IT |
| <b>fifth and sixth dataset</b> |      |
| AB583679.1                     |      |
| AB674437.1                     |      |
| DQ315776.1                     |      |
| DQ315777.1                     |      |
| EU594382.1                     |      |
| EU594434.1                     |      |
| EU594435.1                     |      |
| EU594436.1                     |      |
| FJ692506.2                     |      |
| FJ692507.2                     |      |
| GQ922000.1                     |      |
| GQ922001.1                     |      |
| GQ922002.1                     |      |
| HE815465.1                     |      |
| HE974377.1                     |      |
| HE974379.1                     |      |
| HQ236014.1                     |      |
| HQ236015.1                     |      |
| HQ236016.1                     |      |
| JF754625.1                     |      |
| JN688678.2                     |      |
| JN688679.2                     |      |
| JN688683.2                     |      |
| JN688685.2                     |      |
| JN688689.2                     |      |
| JN688708.2                     |      |
| JN688710.2                     |      |
| JN688711.2                     |      |
| JN688712.2                     |      |
| JN688713.2                     |      |
| JN688715.2                     |      |
| JN688716.2                     |      |
| JN688722.2                     |      |
| JQ023666.1                     |      |
| JX470760.1                     |      |
| JX898686.1                     |      |
| JX898687.1                     |      |

|            |  |
|------------|--|
| JX898688.1 |  |
| JX898689.1 |  |
| JX898690.1 |  |
| JX898691.1 |  |
| JX898692.1 |  |
| JX898693.1 |  |
| JX898694.1 |  |
| JX898695.1 |  |
| JX898696.1 |  |
| JX898697.1 |  |
| JX898698.1 |  |
| JX898699.1 |  |
| KC012652.1 |  |
| KF679988.1 |  |
| KF679989.1 |  |
| KF679990.1 |  |
| KF679991.1 |  |
| KF679992.1 |  |
| KF679993.1 |  |
| KJ647349.1 |  |
| KJ647351.1 |  |
| KJ647355.1 |  |
| KM359442.1 |  |
| KM386676.1 |  |
| KM519455.1 |  |
| KM577663.1 |  |
| KM577664.1 |  |
| KM577665.1 |  |
| KM577666.1 |  |
| KM577667.1 |  |
| KM606745.1 |  |
| KP090177.1 |  |
| KP090178.1 |  |
| KP090179.1 |  |
| KP090180.1 |  |
| KP090181.1 |  |
| KP322602.1 |  |
| KT749845.1 |  |
| KU736926.1 |  |
| KU736927.1 |  |
| MG877709.1 |  |
| MG877711.1 |  |
| MG877718.1 |  |
| MG877719.1 |  |
| MG877720.1 |  |
| MG877726.1 |  |

|            |  |
|------------|--|
| MG877727.1 |  |
| MG877728.1 |  |
| MH724214.1 |  |
| MH724215.1 |  |
| MH724218.1 |  |
| MH724219.1 |  |
| MH724220.1 |  |
| MH724221.1 |  |
| MH724222.1 |  |
| MH724224.1 |  |
| MH724225.1 |  |
| MH724226.1 |  |
| MH724227.1 |  |
| MH724228.1 |  |
| MH724229.1 |  |
| MH724230.1 |  |
| MH724232.1 |  |
| MH724233.1 |  |
| MH724234.1 |  |
| MH724235.1 |  |
| MH724237.1 |  |
| MH724239.1 |  |
| MH724240.1 |  |
| MH724242.1 |  |
| MH724243.1 |  |
| MH724245.1 |  |
| MH724248.1 |  |
| MH724249.1 |  |
| MH724250.1 |  |
| MK507912.1 |  |
| MK541688.1 |  |
| MN310708.1 |  |
| MN310709.1 |  |
| MN310710.1 |  |
| MN310711.1 |  |
| MN310712.1 |  |
| MN310713.1 |  |
| MN310714.1 |  |
| MN310715.1 |  |
| MT210033.1 |  |
|            |  |
